# Supplementary material for: Utilization of community health workers for malaria treatment: results from a three-year panel study in the districts of Kaya and Zorgho, Burkina Faso
Source: Springer Nature journal article supplement (doi:10.1186/s12936-015-0591-9), 2015-02-12
Supplement: MOESM1 [file 9761060]

Additional file 1 Use of CHW as first treatment-seeking action for sick children according the presence of fever or danger signs.

**Comparison of use of CHWs by sick children with vs. without fever**

-----  
 -> year = 2011

```

+-----+
| Key   |
+-----+
|       |
| frequency |
| column percentage |
+-----+
  
```

| First used<br>CHW | With fever?   |               | Total         |
|-------------------|---------------|---------------|---------------|
|                   | yes           | no            |               |
| no                | 555<br>96.19  | 127<br>98.45  | 682<br>96.60  |
| yes               | 22<br>3.81    | 2<br>1.55     | 24<br>3.40    |
| Total             | 577<br>100.00 | 129<br>100.00 | 706<br>100.00 |

Pearson chi2(1) = 1.6433 Pr = 0.200

-----  
 -> year = 2012

```

+-----+
| Key   |
+-----+
|       |
| frequency |
| column percentage |
+-----+
  
```

| First used<br>CHW | With fever?   |               | Total         |
|-------------------|---------------|---------------|---------------|
|                   | yes           | no            |               |
| no                | 644<br>97.43  | 130<br>99.24  | 774<br>97.73  |
| yes               | 17<br>2.57    | 1<br>0.76     | 18<br>2.27    |
| Total             | 661<br>100.00 | 131<br>100.00 | 792<br>100.00 |

Pearson chi2(1) = 1.6100 Pr = 0.204

-----  
-> year = 2013

```
+-----+  
| Key |  
+-----+  
| frequency |  
| column percentage |  
+-----+
```

| First used<br>CHW | With fever?   |              | Total         |
|-------------------|---------------|--------------|---------------|
|                   | yes           | no           |               |
| no                | 573<br>94.55  | 82<br>96.47  | 655<br>94.79  |
| yes               | 33<br>5.45    | 3<br>3.53    | 36<br>5.21    |
| Total             | 606<br>100.00 | 85<br>100.00 | 691<br>100.00 |

Pearson chi2(1) = 0.5542 Pr = 0.457

### Comparison of use of CHWs by sick children with vs. without danger signs

-----

-> year = 2011

```
+-----+  
| Key |  
+-----+  
| frequency |  
| column percentage |  
+-----+
```

| First used<br>CHW | With danger signs? |               | Total         |
|-------------------|--------------------|---------------|---------------|
|                   | yes                | no            |               |
| no                | 500<br>96.34       | 182<br>97.33  | 682<br>96.60  |
| yes               | 19<br>3.66         | 5<br>2.67     | 24<br>3.40    |
| Total             | 519<br>100.00      | 187<br>100.00 | 706<br>100.00 |

Pearson chi2(1) = 0.4079 Pr = 0.523

-----  
-> year = 2012

```
+-----+  
| Key  
+-----+  
| frequency  
| column percentage  
+-----+
```

| First used<br>CHW | With danger signs? |               | Total         |
|-------------------|--------------------|---------------|---------------|
|                   | yes                | no            |               |
| no                | 607<br>98.06       | 167<br>96.53  | 774<br>97.73  |
| yes               | 12<br>1.94         | 6<br>3.47     | 18<br>2.27    |
| Total             | 619<br>100.00      | 173<br>100.00 | 792<br>100.00 |

Pearson chi2(1) = 1.4243 Pr = 0.233

-----  
-> year = 2013

```
+-----+  
| Key  
+-----+  
| frequency  
| column percentage  
+-----+
```

| First used<br>CHW | With danger signs? |               | Total         |
|-------------------|--------------------|---------------|---------------|
|                   | yes                | no            |               |
| no                | 490<br>94.41       | 160<br>96.39  | 650<br>94.89  |
| yes               | 29<br>5.59         | 6<br>3.61     | 35<br>5.11    |
| Total             | 519<br>100.00      | 166<br>100.00 | 685<br>100.00 |

Pearson chi2(1) = 1.0100 Pr = 0.315
